# Supplementary material for: The potential adjunctive benefit of adding metformin to standard treatment in inoperable cancer patients: a meta-analysis of randomized controlled trials
Source: PubMed Central journal article supplement — Ann Transl Med. 2020 Nov;8(21):1404. doi: 10.21037/atm-20-4441 (PMC7723600; doi:10.21037/atm-20-4441), 2020-11
Supplement: atm-08-21-1404-supplementary.pdf [file atm-08-21-1404-supplementary.pdf]

**Table S1** Quality assessment of included studies by Jadad quality scale

| Studies       | Items         |                           |                 |                          | total score |
|---------------|---------------|---------------------------|-----------------|--------------------------|-------------|
|               | Randomization | Concealment of allocation | Double blinding | Withdrawals and dropouts |             |
| Pimentel 2019 | 2             | 2                         | 2               | 0                        | 6           |
| Nanni 2019    | 2             | 1                         | 0               | 1                        | 4           |
| Li 2019       | 2             | 2                         | 2               | 1                        | 7           |
| Arrieta 2019  | 2             | 1                         | 0               | 1                        | 4           |
| Marrone 2018  | 1             | 1                         | 1               | 0                        | 3           |
| Zhao 2017     | 1             | 1                         | 0               | 1                        | 3           |
| Sayed 2015    | 1             | 1                         | 0               | 1                        | 3           |
| Kordes 2015   | 2             | 2                         | 2               | 1                        | 7           |
| Reni 2016     | 2             | 1                         | 1               | 1                        | 5           |
| Kim 2019      | 2             | 2                         | 2               | 0                        | 6           |

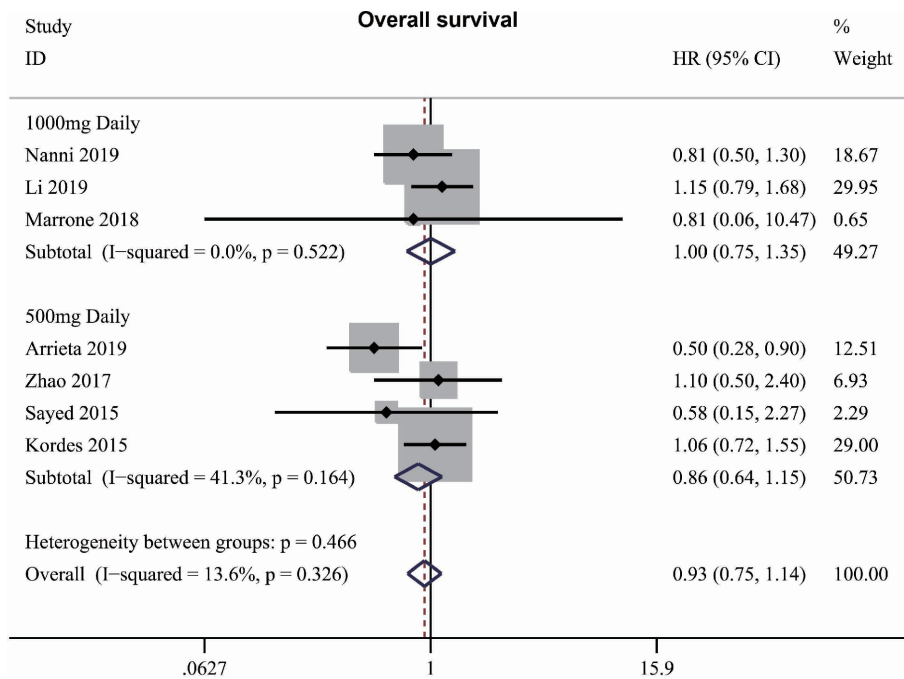

**Figure S1** Subgroup analysis of metformin plus standard treatment on overall survival based on metformin doses. HR, hazard ratio.

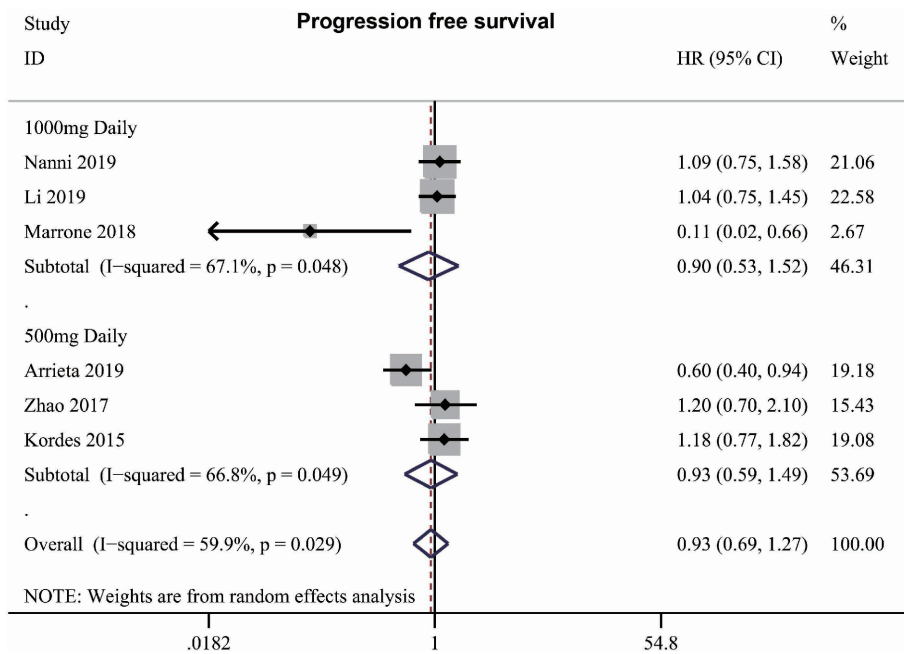

**Figure S2** Subgroup analysis of metformin plus standard treatment on progression free survival based on metformin doses. HR, hazard ratio.

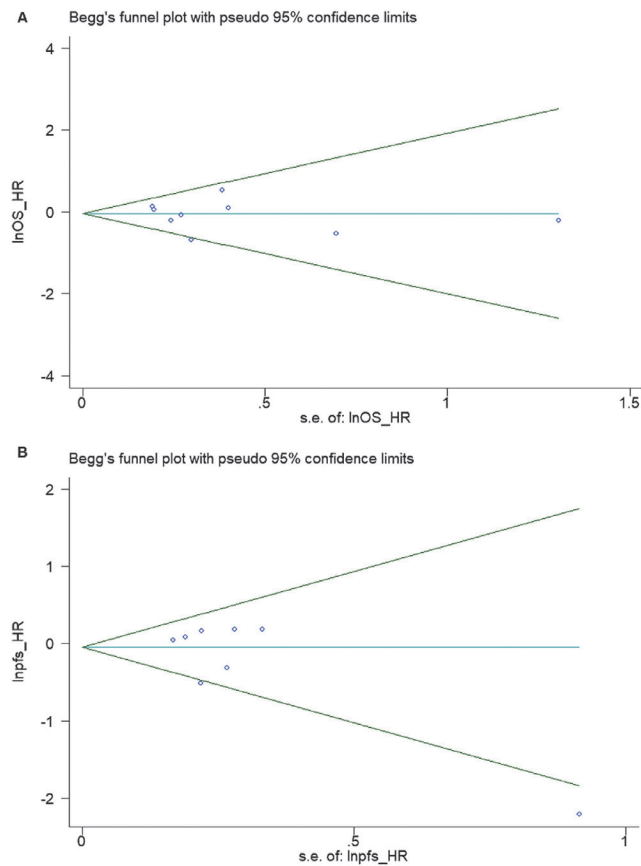

**Figure S3** Results of publication bias analysis.
